# Supplementary material for: Effect of Nr1d1 on Serpina3 Mediated Cell Senescence by Nuclear Receptor Nr4a3 in Mouse Heart-Derived Sca-1+CD31− Cells
Source: Preprints.org preprint supplement (doi:10.20944/preprints202201.0304.v1), 2022-01-20
Supplement: Supplementary file 1 [file Figure S 1&2.docx]

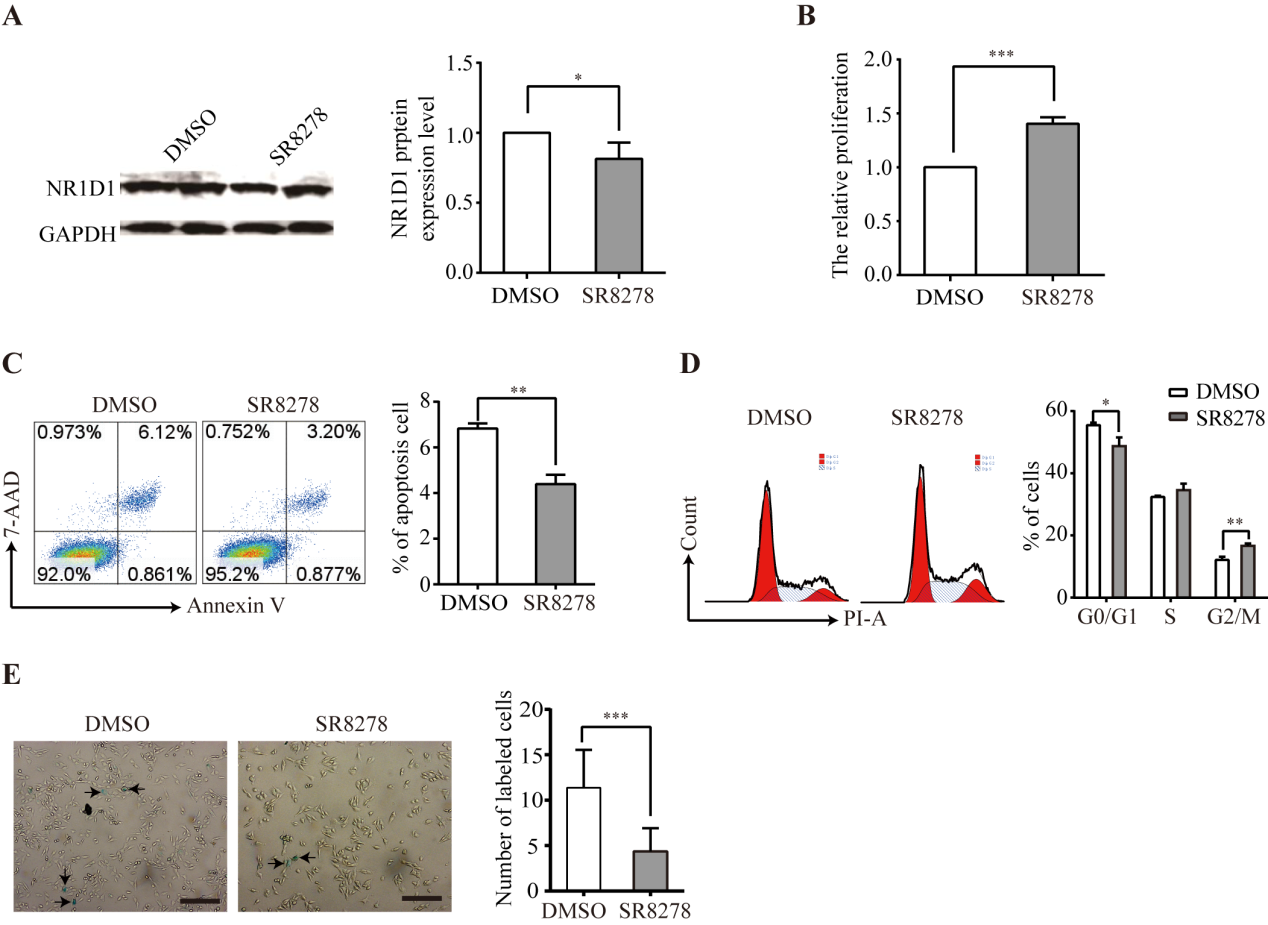


**Supplementary Figure 1. Effect of inhibition of Nr1d1 expression on cellular senescence.**

(a-e): MCM was treated with SR8278, and the control was treated with DMSO. (a) Immunoblotting of *NR1D1* protein levels in MCM cells. (b): MEM proliferation was detected by MTT assay. (c): Apoptosis of MEM detected by annexin V-PE/7-AAD. On the left is a representative flow cytometric scatter plot, and on the right is a graph of apoptosis statistics. (d): Cell cycle analysis in MCM performed by FCM (e): Analysis of Senescence-associated beta-galactosidase staining in MCM. The image on the left is a representative field of view, scale bars: 50 μm. The graph on the right shows the number of cells that were stained blue in each random field of view. Each experiment was repeated 3 times, and 10 random fields of view were counted each time. Data were collected from more than three independent experiments, and presented as mean ± SD.*P < 0.05, **P < 0.01, and ***P < 0.001.


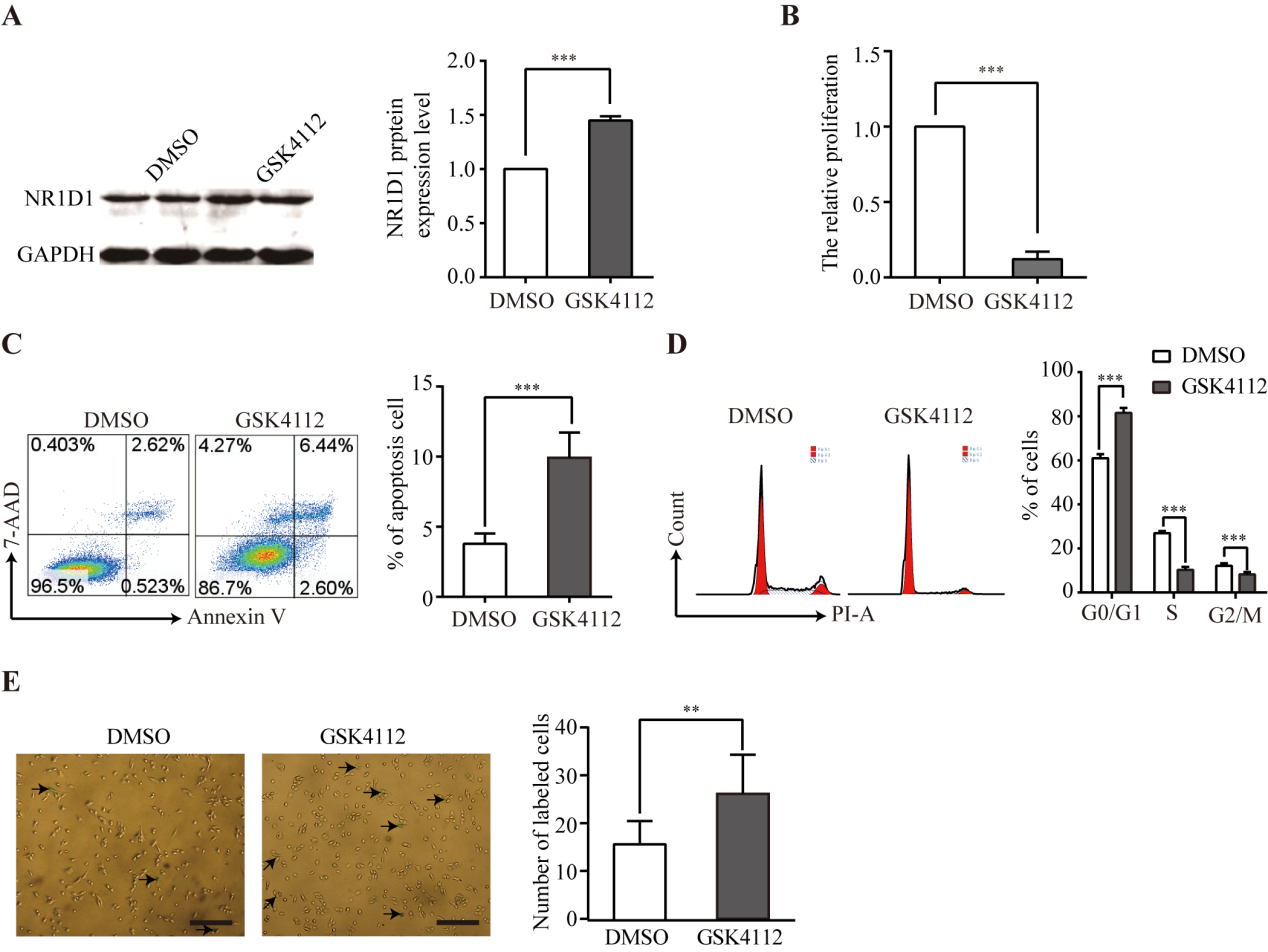


**Supplementary Figure 2. Effect of promoting Nr1d1 expression on cellular senescence.**

(a-e): MCM was treated with GSK4112, and the control was treated with DMSO. (a) Immunoblotting of *NR1D1* protein levels in MCM cells. (b): MEM proliferation was detected by MTT assay. (c): Apoptosis of MEM detected by annexin V-PE/7-AAD. On the left is a representative flow cytometric scatter plot, and on the right is a graph of apoptosis statistics. (d): Cell cycle analysis in MCM performed by FCM (e): Analysis of Senescence-associated beta-galactosidase staining in MCM. The image on the left is a representative field of view, scale bars: 50 μm. The graph on the right shows the number of cells that were stained blue in each random field of view. Each experiment was repeated 3 times, and 10 random fields of view were counted each time. Data were collected from more than three independent experiments, and presented as mean ± SD. **P < 0.01, and ***P < 0.001.
