# Supplementary material for: Effect of Nr1d1 on Serpina3 Mediated Cell Senescence by Nuclear Receptor Nr4a3 in Mouse Heart-Derived Sca-1+CD31− Cells
Source: Preprints.org preprint supplement (doi:10.20944/preprints202201.0304.v1), 2022-01-20
Supplement: Supplementary file 2 [file Table S1.docx]

Table. s1: Sequences of primers

| Primer | Forward primer 5′ → 3′ | Reverse primer 5′ → 3′ |
| --- | --- | --- |
| Nr1d1 (for QPCR) | TGCTTAAGGCTGGCACCTTTG | GTAGGTTGTGCGGCTCAGGAA |
| Dpt | GAACTATGCCTGCATGCCTACAC | TCTTGCTATAGCGGCAGCAGTAA |
| Serpina3g | AGGCTGACCTGTCTGCAATCAC | TGCACAACATCCGACACCTG |
| Nr4a3 | CCCAAGTGTACCCAGAGTGGAA | GGAGACTCGGCCATTTGAAAC |
| IL11 | TCGACTGTGACTCGGGACTG | TGTGGGGCGGTTGTTTG |
| Polr2k | AGATAAAGTCCAGGGATCCCATCAG | CCCACATTTCATCGAGCATCA |
| GAPDH | GCTGCCCAGAACATCATCCCT | TGAAGTCGCAGGAGACAACC |
